# Supplementary material for: Evaluation of serum CEA, CYFRA21-1 and CA125 for the early detection of colorectal cancer using longitudinal preclinical samples
Source: PubMed Central journal article supplement (PMC4506388; doi:10.1038/bjc.2015.202), 2015-06-02

## Supplementary Data

**Table S1** Clinico-pathological data associated with malignant and benign cases

|                           | Early stage<br>(n=20) | Late stage<br>(n=20) | Benign<br>(n=20) |
|---------------------------|-----------------------|----------------------|------------------|
| <b>Primary site</b>       |                       |                      |                  |
| Caecum                    | 3 (15%)               | 4 (20%)              | 1 (5%)           |
| Ascending colon           | 6 (30%)               | 2 (10%)              | 0 (0%)           |
| Transverse colon          | 0 (0%)                | 3 (15%)              | 3 (15%)          |
| Splenic flexure           | 1 (5%)                | 0 (0%)               | 0 (0%)           |
| Descending colon          | 1 (5%)                | 0 (0%)               | 2 (10%)          |
| Sigmoid colon             | 5 (25%)               | 5 (25%)              | 8 (40%)          |
| Rectosigmoid              | 0 (0%)                | 0 (0%)               | 1 (5%)           |
| Rectum                    | 3 (15%)               | 6 (30%)              | 2 (10%)          |
| Undetermined              | 1 (5%)                | 0 (0%)               | 3 (15%)          |
| <b>Standardised stage</b> |                       |                      |                  |
| A                         | 7 (35%)               | 0 (0%)               | NA               |
| B                         | 13 (65%)              | 0 (0%)               | NA               |
| C                         | 0 (0%)                | 14 (70%)             | NA               |
| D                         | 0 (0%)                | 6 (30%)              | NA               |
| <b>Grade</b>              |                       |                      |                  |
| I                         | 1 (5%)                | 2 (10%)              | NA               |
| II                        | 12 (60%)              | 12 (60%)             | NA               |
| III                       | 3 (15%)               | 2 (10%)              | NA               |
| Unknown                   | 4 (20%)               | 4 (20%)              |                  |
| <b>Morphology</b>         |                       |                      |                  |
| Adenocarcinoma            | 20 (100%)             | 20 (100%)            | NA               |

**Table S2** Study group sample sizes for CEA, CYFRA21-1 and CA125 determinations.

| Years to diagnosis | CEA and CYFRA21-1/CA125 |            |        |              |           |
|--------------------|-------------------------|------------|--------|--------------|-----------|
|                    | Early control           | Early case | Benign | Late control | Late case |
| 0-1                | 20/24                   | 20/23      | 18/20  | 20/30        | 20/29     |
| 1-2                | 19/24                   | 18/23      | 20/20  | 18/21        | 19/22     |
| 2-3                | 20/20                   | 19/23      | 18/24  | 17/22        | 17/20     |
| 3-4                | 20/20                   | 18/20      | 20/22  | 20/22        | 20/27     |

**Table S3** Tumour marker performance according to different cut-off thresholds (ng/mL) and pre-diagnosis time group. 'CEA or CYFRA' refers to a combined panel where an elevated level of either marker is considered positive. (A) Cancer cases versus non-cancer controls + benigns; (B) Cancer cases versus benign only. Green shading for sensitivity and red shading for specificity is scaled from highest to lowest value in each table.

(A)

| Time group | Number/Parameter     | CEA      | CYFRA      | CEA or | CEA      | CYFRA    | CEA or | CEA        | CYFRA      | CEA or | CEA        | CYFRA      | CEA or |
|------------|----------------------|----------|------------|--------|----------|----------|--------|------------|------------|--------|------------|------------|--------|
|            |                      | >5 ng/mL | >3.3 ng/mL | CYFRA  | >3 ng/mL | >2 ng/mL | CYFRA  | >2.5 ng/mL | >1.5 ng/mL | CYFRA  | >2.5 ng/mL | >3.3 ng/mL | CYFRA  |
| 0-1 yr     | Case positive (n)    | 10       | 4          | 12     | 16       | 11       | 20     | 23         | 20         | 31     | 23         | 4          | 24     |
|            | Case negative (n)    | 30       | 36         | 28     | 24       | 29       | 20     | 17         | 20         | 9      | 17         | 36         | 16     |
|            | Control positive (n) | 3        | 2          | 5      | 8        | 9        | 17     | 11         | 21         | 30     | 11         | 2          | 13     |
|            | Control negative (n) | 55       | 56         | 53     | 50       | 49       | 41     | 47         | 37         | 28     | 47         | 56         | 45     |
|            | Sensitivity (%)      | 25.0     | 10.0       | 30.0   | 40.0     | 27.5     | 50.0   | 57.5       | 50.0       | 77.5   | 57.5       | 10.0       | 60.0   |
|            | Specificity (%)      | 94.8     | 96.6       | 91.4   | 86.2     | 84.5     | 70.7   | 81.0       | 63.8       | 48.3   | 81.0       | 96.6       | 77.6   |
| 1-2 yr     | Case positive (n)    | 5        | 1          | 5      | 11       | 5        | 13     | 14         | 10         | 20     | 14         | 1          | 14     |
|            | Case negative (n)    | 32       | 36         | 32     | 26       | 32       | 24     | 23         | 27         | 17     | 23         | 36         | 23     |
|            | Control positive (n) | 4        | 2          | 6      | 6        | 4        | 10     | 11         | 9          | 18     | 11         | 2          | 13     |
|            | Control negative (n) | 90       | 92         | 87     | 87       | 87       | 79     | 80         | 75         | 63     | 80         | 92         | 77     |
|            | Sensitivity (%)      | 13.5     | 2.7        | 13.5   | 29.7     | 13.5     | 35.1   | 37.8       | 27.0       | 54.1   | 37.8       | 2.7        | 37.8   |
|            | Specificity (%)      | 95.7     | 97.9       | 93.5   | 93.5     | 95.6     | 88.8   | 87.9       | 89.3       | 77.8   | 87.9       | 97.9       | 85.6   |
| 2-3 yr     | Case positive (n)    | 4        | 0          | 4      | 9        | 3        | 10     | 11         | 11         | 18     | 11         | 0          | 11     |
|            | Case negative (n)    | 32       | 36         | 32     | 27       | 33       | 26     | 25         | 25         | 18     | 25         | 36         | 25     |
|            | Control positive (n) | 2        | 1          | 3      | 4        | 4        | 8      | 9          | 12         | 19     | 9          | 1          | 10     |
|            | Control negative (n) | 53       | 54         | 52     | 51       | 51       | 47     | 46         | 43         | 36     | 46         | 54         | 45     |
|            | Sensitivity (%)      | 11.1     | 0.0        | 11.1   | 25.0     | 8.3      | 27.8   | 30.6       | 30.6       | 50.0   | 30.6       | 0.0        | 30.6   |
|            | Specificity (%)      | 96.4     | 98.2       | 94.5   | 92.7     | 92.7     | 85.5   | 83.6       | 78.2       | 65.5   | 83.6       | 98.2       | 81.8   |
| 3-4 yr     | Case positive (n)    | 1        | 0          | 1      | 9        | 3        | 11     | 10         | 10         | 16     | 10         | 0          | 10     |
|            | Case negative (n)    | 37       | 38         | 37     | 29       | 35       | 27     | 28         | 28         | 22     | 28         | 38         | 28     |
|            | Control positive (n) | 4        | 1          | 5      | 4        | 6        | 10     | 7          | 13         | 20     | 7          | 1          | 8      |
|            | Control negative (n) | 56       | 59         | 55     | 56       | 54       | 50     | 53         | 47         | 40     | 53         | 59         | 52     |
|            | Sensitivity (%)      | 2.6      | 0.0        | 2.6    | 23.7     | 7.9      | 28.9   | 26.3       | 26.3       | 42.1   | 26.3       | 0.0        | 26.3   |
|            | Specificity (%)      | 93.3     | 98.3       | 91.7   | 93.3     | 90.0     | 83.3   | 88.3       | 78.3       | 66.7   | 88.3       | 98.3       | 86.7   |
| 1-4 yr     | Case positive (n)    | 10       | 1          | 10     | 29       | 11       | 34     | 35         | 31         | 54     | 35         | 1          | 35     |
|            | Case negative (n)    | 101      | 110        | 101    | 82       | 100      | 77     | 76         | 80         | 57     | 76         | 110        | 76     |
|            | Control positive (n) | 10       | 4          | 14     | 14       | 14       | 28     | 27         | 34         | 57     | 27         | 4          | 31     |
|            | Control negative (n) | 162      | 168        | 158    | 158      | 158      | 144    | 145        | 138        | 115    | 145        | 168        | 141    |
|            | Sensitivity (%)      | 9.0      | 0.9        | 9.0    | 26.1     | 9.9      | 30.6   | 31.5       | 27.9       | 48.6   | 31.5       | 0.9        | 31.5   |
|            | Specificity (%)      | 94.2     | 97.7       | 91.9   | 91.9     | 91.9     | 83.7   | 84.3       | 80.2       | 66.9   | 84.3       | 97.7       | 82.0   |
| 0-4 yr     | Case positive (n)    | 20       | 5          | 22     | 45       | 22       | 54     | 58         | 51         | 85     | 58         | 5          | 59     |
|            | Case negative (n)    | 131      | 146        | 129    | 106      | 129      | 97     | 93         | 100        | 66     | 93         | 146        | 92     |
|            | Control positive (n) | 13       | 6          | 19     | 22       | 23       | 45     | 38         | 55         | 87     | 38         | 6          | 44     |
|            | Control negative (n) | 217      | 224        | 211    | 208      | 207      | 185    | 192        | 175        | 143    | 192        | 224        | 186    |
|            | Sensitivity (%)      | 13.2     | 3.3        | 14.6   | 29.8     | 14.6     | 35.8   | 38.4       | 33.8       | 56.3   | 38.4       | 3.3        | 39.1   |
|            | Specificity (%)      | 94.3     | 97.4       | 91.7   | 90.4     | 90.0     | 80.4   | 83.5       | 76.1       | 62.2   | 83.5       | 97.4       | 80.9   |

(B)

| Time group | Number/Parameter     | CEA      | CYFRA      | CEA or | CEA      | CYFRA    | CEA or | CEA        | CYFRA      | CEA or | CEA        | CYFRA      | CEA or |
|------------|----------------------|----------|------------|--------|----------|----------|--------|------------|------------|--------|------------|------------|--------|
|            |                      | >5 ng/mL | >3.3 ng/mL | CYFRA  | >3 ng/mL | >2 ng/mL | CYFRA  | >2.5 ng/mL | >1.5 ng/mL | CYFRA  | >2.5 ng/mL | >3.3 ng/mL | CYFRA  |
| 0-1 yr     | Case positive (n)    | 10       | 4          | 12     | 16       | 11       | 20     | 23         | 20         | 31     | 23         | 4          | 24     |
|            | Case negative (n)    | 30       | 36         | 28     | 24       | 29       | 20     | 17         | 20         | 9      | 17         | 36         | 16     |
|            | Control positive (n) | 1        | 0          | 1      | 2        | 2        | 4      | 3          | 6          | 8      | 3          | 0          | 3      |
|            | Control negative (n) | 17       | 18         | 17     | 16       | 16       | 14     | 15         | 12         | 10     | 15         | 18         | 15     |
|            | Sensitivity (%)      | 25.0     | 10.0       | 30.0   | 40.0     | 27.5     | 50.0   | 57.5       | 50.0       | 77.5   | 57.5       | 10.0       | 60.0   |
|            | Specificity (%)      | 94.4     | 100.0      | 94.4   | 88.9     | 88.9     | 77.8   | 83.3       | 66.7       | 55.6   | 83.3       | 100.0      | 83.3   |
| 1-2 yr     | Case positive (n)    | 5        | 1          | 5      | 11       | 5        | 13     | 14         | 10         | 20     | 14         | 1          | 14     |
|            | Case negative (n)    | 32       | 36         | 32     | 26       | 32       | 24     | 23         | 27         | 17     | 23         | 36         | 23     |
|            | Control positive (n) | 1        | 0          | 1      | 2        | 1        | 3      | 2          | 2          | 4      | 2          | 0          | 2      |
|            | Control negative (n) | 19       | 20         | 19     | 18       | 19       | 17     | 18         | 18         | 16     | 18         | 20         | 18     |
|            | Sensitivity (%)      | 13.5     | 2.7        | 13.5   | 29.7     | 13.5     | 35.1   | 37.8       | 27.0       | 54.1   | 37.8       | 2.7        | 37.8   |
|            | Specificity (%)      | 95.0     | 100.0      | 95.0   | 90.0     | 95.0     | 85.0   | 90.0       | 90.0       | 80.0   | 90.0       | 100.0      | 90.0   |
| 2-3 yr     | Case positive (n)    | 4        | 0          | 4      | 9        | 3        | 10     | 11         | 11         | 18     | 11         | 0          | 11     |
|            | Case negative (n)    | 32       | 36         | 32     | 27       | 33       | 26     | 25         | 25         | 18     | 25         | 36         | 25     |
|            | Control positive (n) | 1        | 0          | 1      | 1        | 0        | 1      | 3          | 1          | 3      | 3          | 0          | 3      |
|            | Control negative (n) | 17       | 18         | 17     | 17       | 18       | 17     | 15         | 17         | 15     | 15         | 18         | 15     |
|            | Sensitivity (%)      | 11.1     | 0.0        | 11.1   | 25.0     | 8.3      | 27.8   | 30.6       | 30.6       | 50.0   | 30.6       | 0.0        | 30.6   |
|            | Specificity (%)      | 94.4     | 100.0      | 94.4   | 94.4     | 100.0    | 94.4   | 83.3       | 94.4       | 83.3   | 83.3       | 100.0      | 83.3   |
| 3-4 yr     | Case positive (n)    | 1        | 0          | 1      | 9        | 3        | 11     | 10         | 10         | 16     | 10         | 0          | 10     |
|            | Case negative (n)    | 37       | 38         | 37     | 29       | 35       | 27     | 28         | 28         | 22     | 28         | 38         | 28     |
|            | Control positive (n) | 1        | 0          | 1      | 1        | 3        | 4      | 2          | 3          | 5      | 2          | 0          | 2      |
|            | Control negative (n) | 19       | 20         | 19     | 19       | 17       | 16     | 18         | 17         | 15     | 18         | 20         | 18     |
|            | Sensitivity (%)      | 2.6      | 0.0        | 2.6    | 23.7     | 7.9      | 28.9   | 26.3       | 26.3       | 42.1   | 26.3       | 0.0        | 26.3   |
|            | Specificity (%)      | 95.0     | 100.0      | 95.0   | 95.0     | 85.0     | 80.0   | 90.0       | 85.0       | 75.0   | 90.0       | 100.0      | 90.0   |
| 1-4 yr     | Case positive (n)    | 10       | 1          | 10     | 29       | 11       | 34     | 35         | 31         | 54     | 35         | 1          | 35     |
|            | Case negative (n)    | 101      | 110        | 101    | 82       | 100      | 77     | 76         | 80         | 57     | 76         | 110        | 76     |
|            | Control positive (n) | 3        | 0          | 3      | 4        | 4        | 8      | 7          | 6          | 12     | 7          | 0          | 7      |
|            | Control negative (n) | 55       | 58         | 55     | 54       | 54       | 50     | 51         | 52         | 46     | 51         | 58         | 51     |
|            | Sensitivity (%)      | 9.0      | 0.9        | 9.0    | 26.1     | 9.9      | 30.6   | 31.5       | 27.9       | 48.6   | 31.5       | 0.9        | 31.5   |
|            | Specificity (%)      | 94.8     | 100.0      | 94.8   | 93.1     | 93.1     | 86.2   | 87.9       | 89.7       | 79.3   | 87.9       | 100.0      | 87.9   |
| 0-4 yr     | Case positive (n)    | 20       | 5          | 22     | 45       | 22       | 54     | 58         | 51         | 85     | 58         | 5          | 59     |
|            | Case negative (n)    | 131      | 146        | 129    | 106      | 129      | 97     | 93         | 100        | 66     | 93         | 146        | 92     |
|            | Control positive (n) | 4        | 0          | 4      | 6        | 6        | 12     | 10         | 12         | 20     | 10         | 0          | 10     |
|            | Control negative (n) | 72       | 76         | 72     | 70       | 70       | 64     | 66         | 64         | 56     | 66         | 76         | 66     |
|            | Sensitivity (%)      | 13.2     | 3.3        | 14.6   | 29.8     | 14.6     | 35.8   | 38.4       | 33.8       | 56.3   | 38.4       | 3.3        | 39.1   |
|            | Specificity (%)      | 94.7     | 100.0      | 94.7   | 92.1     | 92.1     | 84.2   | 86.8       | 84.2       | 73.7   | 86.8       | 100.0      | 86.8   |

All Cases vs. Benign

**Figure S1** Serum CEA longitudinal profiles in individual case control samples. (A) Early stage cases; (B) Late stage cases. Horizontal line represents 5 ng/mL CEA.

(A)

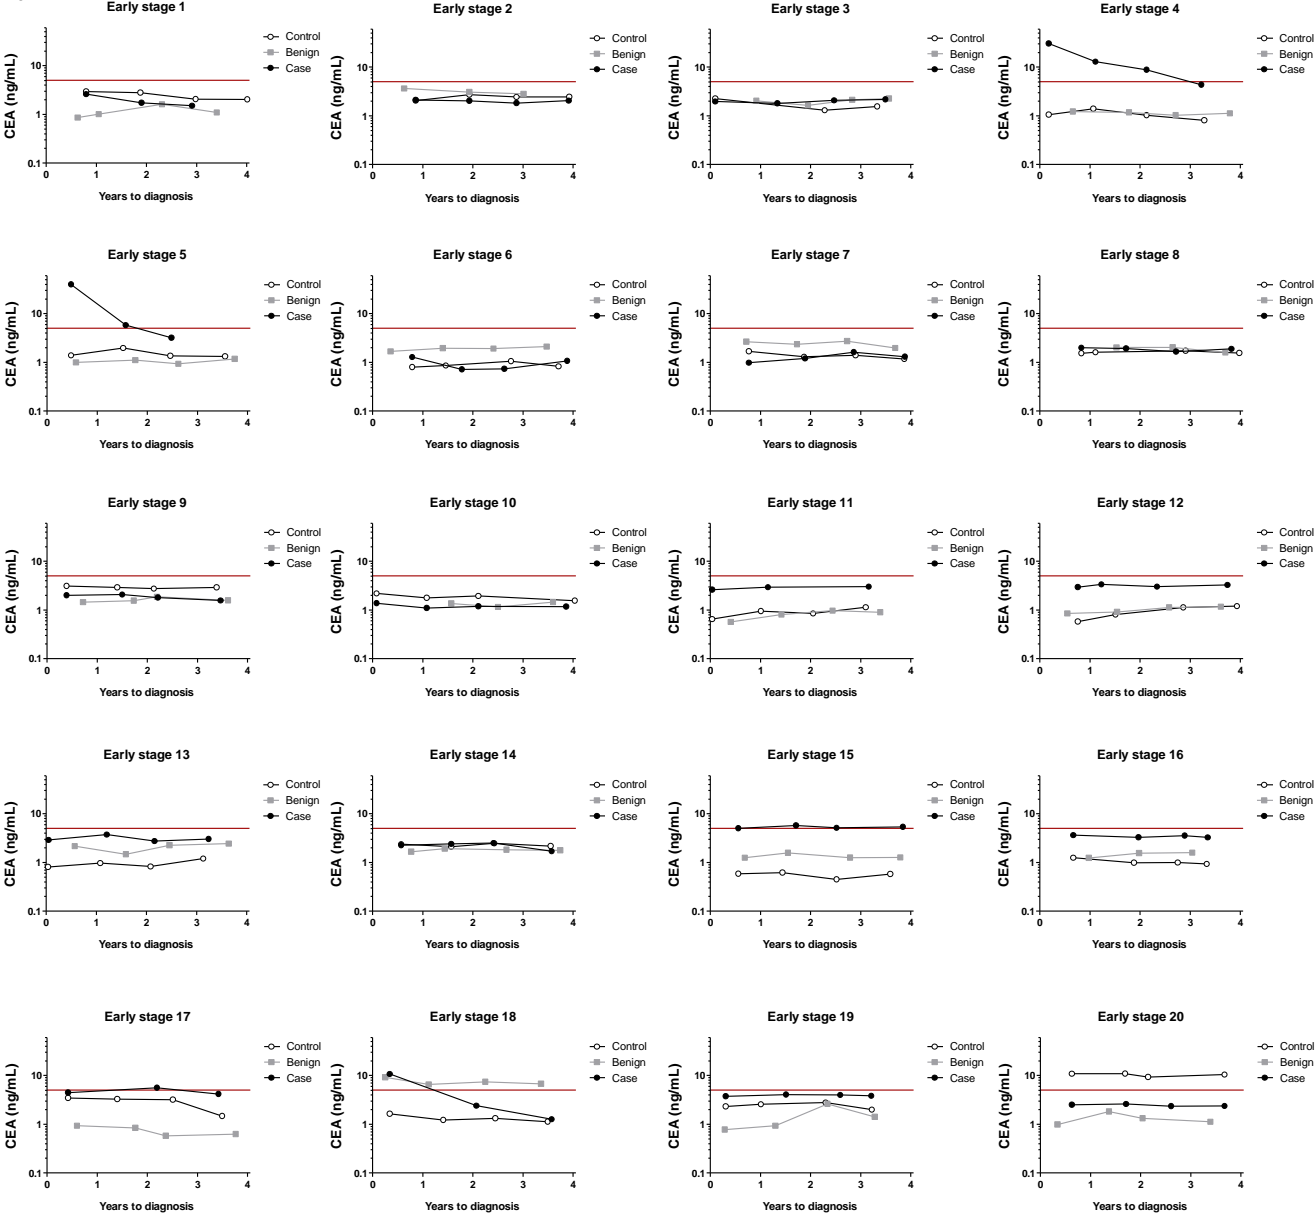

(B)

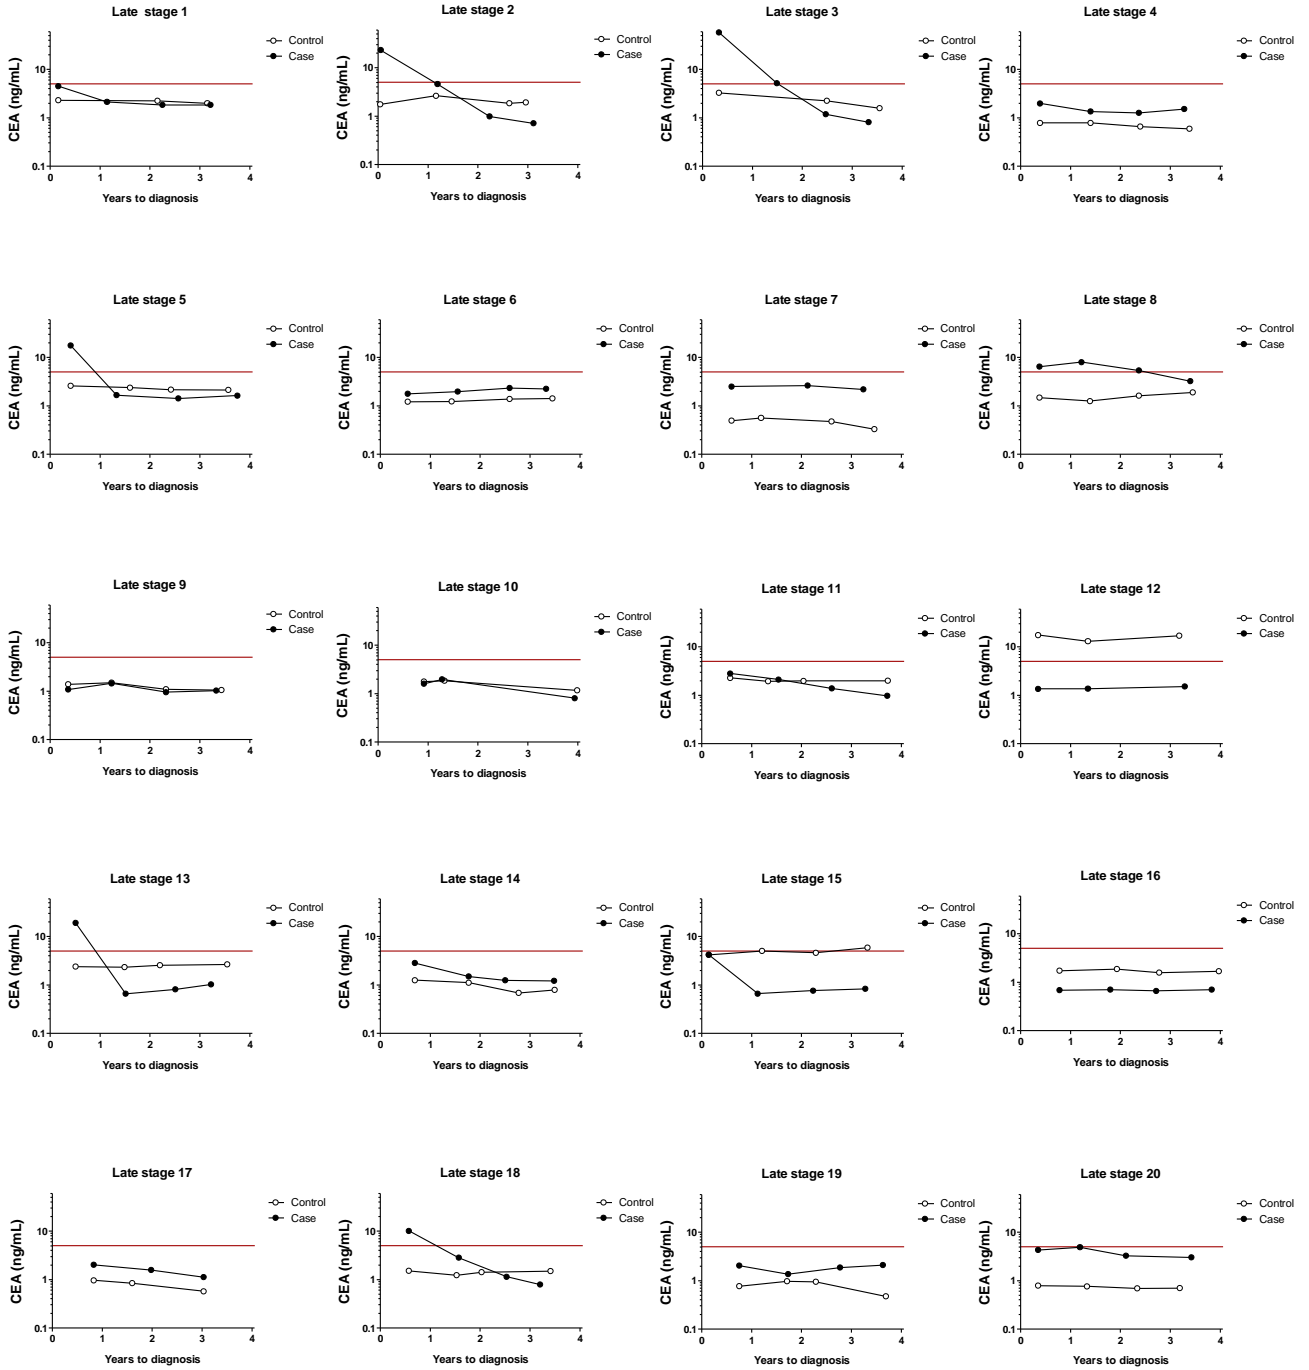

Supplement: bjc2015202x1.pdf [file bjc2015202x1.pdf]
